# Supplementary material
Source: publisher site journal article supplement (https://www.dovepress.com/article/247498)
Supplement: Supplementary file 1 [file get_supplementary_file.php]

**Supplementary Figure 1. Annual mean incremental healthcare costs among all incident T2DM individuals with vascular disease and matched non-DM controls**

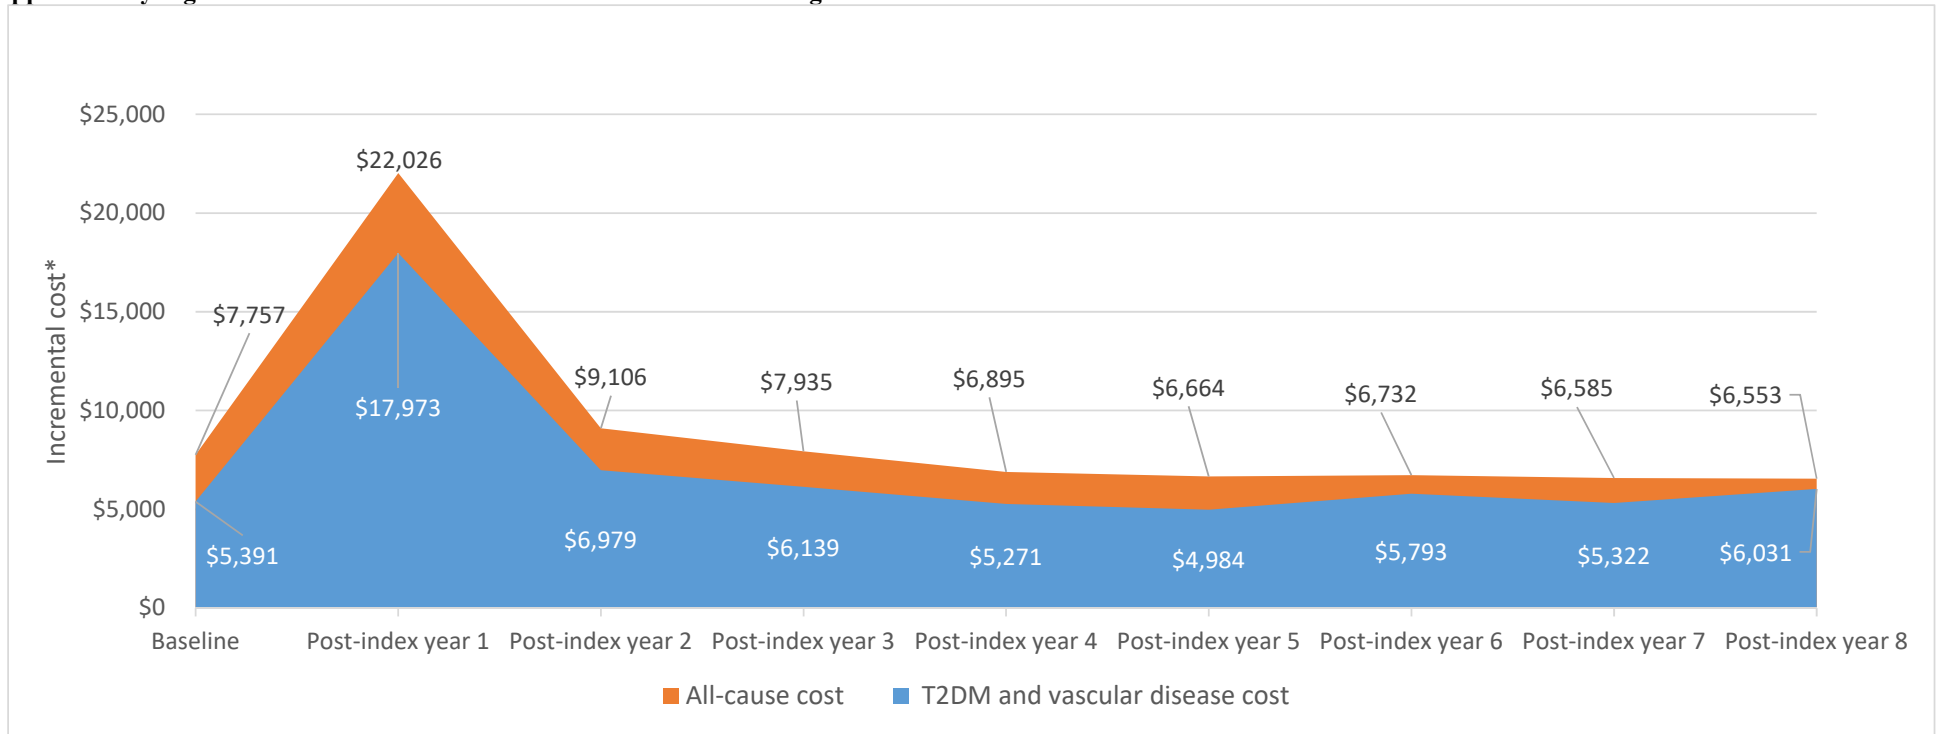

Abbreviations: T2DM: type 2 diabetes mellitus

\* Incremental costs defined as difference in mean annual cost between individuals with incident T2DM with vascular disease and matched non-DM controls. Mean annualized costs weighted by number of days individuals were alive during each measurement period. All costs adjusted to 2015 US dollars using medical care component of the Bureau of Labor Statistics Consumer Price Index.

**Supplementary Table 1. Diagnosis codes used to identify microvascular and macrovascular diseases and other clinical conditions of interest**

|                                                 | ICD-9-CM Codes         | ICD-10-CM Codes                    |
|-------------------------------------------------|------------------------|------------------------------------|
| <b>Microvascular and Macrovascular Diseases</b> |                        |                                    |
| <b>Neuropathy</b>                               |                        |                                    |
| Diabetic neuropathy                             | 356.9x, 250.6x         | E08.4%, E10.4%, E11.4%, E13.4%     |
| Amyotrophy (nondiabetic)                        | 358.1x                 | G12.21%, G54.5%                    |
| Cranial nerve palsy (including                  | 951.0x, 951.1x, 951.3x | G51.0%, G52.%, H49.0%, H49.1%,     |
| Mononeuropathy                                  | 354.0x-355.9x          | G56.%, G57.%, G58.%, G59.0%        |
| Charcot's arthropathy                           | 713.5x                 | M14.6%                             |
| Polyneuropathy                                  | 357.2x                 | G61.%, G62.%, G63.%, G60.3%        |
| Neurogenic bladder                              | 596.54                 | N31.9%                             |
| Autonomic neuropathy                            | 337.0x, 337.1x         | G90.0%, G90.8%, G90.9%             |
| Gastroparesis (including                        | 564.5x, 536.3x         | K31.84%, E08.43%, E10.43%,         |
| Orthostatic hypotension                         | 458.0x                 | I95.1%, I95.2%, G90.3%             |
| <b>Nephropathy</b>                              |                        |                                    |
| Diabetic nephropathy                            | 250.4x                 | E08.2%, E10.2%, E11.2%, E13.2%     |
| Acute glomerulonephritis                        | 580.xx                 | N00.%                              |
| Nephrotic syndrome                              | 581.xx                 | N04.%                              |
| Hypertension, nephrosis                         | 581.81                 | I12.%, I13.%                       |
| Chronic glomerulonephritis                      | 582.xx                 | N03.%                              |
| Unspecified                                     | 583.xx                 | N05.%                              |
| Chronic renal failure (disease)                 | 585.xx                 | N18.%                              |
| Renal failure NOS                               | 586.xx                 | N19.%                              |
| Renal insufficiency                             | 593.9x                 | N28.9%, N18.9%                     |
| <b>Retinopathy</b>                              |                        |                                    |
| Diabetic ophthalmologic disease                 | 250.5x                 | E08.3%, E10.3%, E11.3%, E13.3%     |
| Background retinopathy                          | 362.01                 | H35.0%                             |
| Other non-diabetic proliferative                | 362.1x                 | H35.2%, H35.4%, H35.7%, H35.8%     |
| Retinal edema                                   | 362.83                 | H35.81%                            |
| CSME                                            | 362.53                 | H35.351, H35.352, H35.353, H35.359 |
| Other retinal disorders                         | 362.81, 362.82         | H35.9%                             |
| Proliferative diabetic retinopathy              | 362.02                 | H35.2%, E08.35%, E10.35%, E11.35%, |
| Retinal detachment                              | 361.xx                 | H33.0%, H33.2%                     |
| Blindness                                       | 369.xx                 | H54.0%, H54.1%, H54.4%, H54.8%     |
| Vitreous hemorrhage                             | 379.23                 | H43.1%                             |
| <b>Cardiovascular</b>                           |                        |                                    |
| Atherosclerosis                                 | 440.xx                 | I70.%                              |
| Other IHD                                       | 411.xx                 | I24.%,                             |
| Angina pectoris                                 | 413.xx                 | I20.%                              |
| Other chronic IHD                               | 414.xx                 | I25.1%, I25.5%, I25.6%, I25.7%,    |
| Myocardial infarction (acute)                   | 410.xx                 | I21.%, I22.%, I23.%                |
| Ventricular fibrillation                        | 427.1x, 427.3x         | I49.0%                             |
| Atrial fibrillation                             | 427.4x, 427.5x         | I48.%                              |

|                                    | ICD-9-CM Codes                                                                                                                                        | ICD-10-CM Codes                                                                                            |
|------------------------------------|-------------------------------------------------------------------------------------------------------------------------------------------------------|------------------------------------------------------------------------------------------------------------|
| Other ASCVD                        | 429.2x                                                                                                                                                | -                                                                                                          |
| Old myocardial infarction          | 412.xx                                                                                                                                                | I25.2%                                                                                                     |
| Heart failure                      | 428.xx                                                                                                                                                | I50.%                                                                                                      |
| Atherosclerosis, severe            | 440.23, 440.24                                                                                                                                        | -                                                                                                          |
| Aortic aneurysm/dissection         | 441.xx                                                                                                                                                | I71.%                                                                                                      |
| <b>Cerebrovascular</b>             |                                                                                                                                                       |                                                                                                            |
| TIA                                | 435.xx                                                                                                                                                | G45.%                                                                                                      |
| Stroke                             | 431.xx, 433.xx, 434.xx,                                                                                                                               | I63.%                                                                                                      |
| <b>Peripheral vascular disease</b> |                                                                                                                                                       |                                                                                                            |
| Diabetic PVD                       | 250.7x                                                                                                                                                | E08.5%, E10.5%, E11.5%. E13.%                                                                              |
| Other aneurysm, LE                 | 442.3x                                                                                                                                                | I72.4%                                                                                                     |
| Foot wound + complication          | 892.1x                                                                                                                                                | E08.621, E08.52%, E10.621, E10.52%,<br>E11.621, E11.52%, E13.621, E13.621,                                 |
| PVD/Claudication, intermittent     | 443.81, 443.9x, 443.9x                                                                                                                                | I73.9%                                                                                                     |
| Embolism/thrombosis                | 444.22                                                                                                                                                | I74.3%                                                                                                     |
| Gangrene                           | 785.4x                                                                                                                                                | I96.%                                                                                                      |
| Gas gangrene                       | 040.xx                                                                                                                                                | A48.0%                                                                                                     |
| Ulcer of lower limbs               | 707.1x                                                                                                                                                | L97.%                                                                                                      |
| <b>Other Clinical Conditions</b>   |                                                                                                                                                       |                                                                                                            |
| Myocardial infarction              | 410.xx                                                                                                                                                | I21%                                                                                                       |
| Stroke                             | 431.xx, 433.xx, 434.xx,<br>436.xx                                                                                                                     | I63%, I64%, I69%                                                                                           |
| Depression                         | 296.2x, 296.3x, 300.4x,<br>311.xx                                                                                                                     | F32%, F33%, F34.1%                                                                                         |
| AIDS/HIV                           | 042.xx, 043.xx, 044.xx                                                                                                                                | B20.%–B22.%, B24.%                                                                                         |
| Diabetes with other coma           | 250.3x                                                                                                                                                | E11.0%                                                                                                     |
| Obesity                            | 278.00, 278.01, V85.3x,<br>V85.4x                                                                                                                     | E66%                                                                                                       |
| Dyslipidaemia                      | 272.xx                                                                                                                                                | E78.0%, E78.1%, E78.2%, E78.3%,<br>E78.4%, E78.5%, E78.6%                                                  |
| Epilepsy                           | 345.xx                                                                                                                                                | G40%                                                                                                       |
| Sleep apnoea                       | 327.2x, 780.51, 780.53,<br>780.57                                                                                                                     | G47.3%                                                                                                     |
| Hypertension                       | 401.xx, 402.xx, 403.xx,<br>404.xx, 405.xx                                                                                                             | I10.%, I11.%, I12.%, I13.%, H35.03%,<br>I67.4%                                                             |
| Congestive heart failure           | 402.01, 402.11, 402.91,<br>404.01 404.03, 404.11,                                                                                                     | I11.0% ,I13.0%,I13.2%, I50%                                                                                |
| Renal disease                      | 403.01, 403.11, 403.91,<br>404.02, 404.03, 404.12,<br>404.13, 404.92, 404.93,<br>582.0x – 583.7x, 585.xx,<br>586.xx, 588.0x, V42.0x,<br>V45.1x, V56.x | I12.0%, I13.1%, N03.2%–N03.7%,<br>N05.2%–N05.7%, N18.%, N19.%,<br>N25.0%, Z49.0%–Z49.2%, Z94.0%,<br>Z99.2% |

|                                     | <b>ICD-9-CM Codes</b>                                                      | <b>ICD-10-CM Codes</b>                                                                                                  |
|-------------------------------------|----------------------------------------------------------------------------|-------------------------------------------------------------------------------------------------------------------------|
| Liver disease                       | 456.0x-456.2x, 571.xx - 573.xx                                             | I85%, K70%-K77%                                                                                                         |
| Pneumonia                           | 997.31, 480.xx - 486.xx                                                    | J12%-J19%, J95.851                                                                                                      |
| COPD                                | 491.xx, 492.xx, 493.2x,                                                    | J41%, J42%, J43%, J44%                                                                                                  |
| Asthma                              | 493.xx                                                                     | J45%                                                                                                                    |
| Peptic ulcer                        | 531.xx-534.xx                                                              | K25%, , K26%, K27%, K28%                                                                                                |
| Connective tissue/rheumatic disease | 446.5x, 710.0x – 710.4x, 714.0x – 714.2x, 714.8x, 725.xx                   | M05.%, M06.%, M31.5%, M32.%– M34.%, M35.1%, M35.3%, M36.0%                                                              |
| Osteoarthritis                      | 715.xx                                                                     | M15%, M16%, M17%, M18%, M19%                                                                                            |
| Osteoporosis                        | 733.0x                                                                     | M81%, M80%, Z87.310                                                                                                     |
| Cancer (primary or metastatic)      | 140.xx – 172.xx, 174.xx – 195.8x, 200.xx – 208.xx, 238.6x, 196.xx – 199.xx | C00.%–C26.%, C30.%–C34.%, C37.%– C41.%, C43.%, C45.%–C58.%, C60.%– C76.%, C81.%–C85.%, C88.%, C90.%– C97.%, C77.%–C80.% |

ICD-9/10-CM: International Classification of Diseases 9<sup>th</sup>/10<sup>th</sup> revision, Clinical Modification; AIDS: Acquired Immune Deficiency Syndrome; ASCVD: atherosclerotic cardiovascular disease; CSME: cystoid macular edema/degeneration; COPD: Chronic Obstructive Pulmonary Disease; IHD: ischemic heart disease; LE: lower extremity; NOS: not otherwise specified; TIA: transient ischemic attack PVD: peripheral vascular disease.
